# Supplementary material for: The Fast Changing Landscape of Sequencing Technologies and Their Impact on Microbial Genome Assemblies and Annotation
Source: PLoS One. 2012 Dec 12;7(12):e48837. doi: 10.1371/journal.pone.0048837 (PMC3520994; doi:10.1371/journal.pone.0048837)
Supplement: Table S1 — List of genomes and their features used for this study. (XLS) [file pone.0048837.s001.xls]

## Sheet: Sheet1
				Repeat analysis																				tblastn analysis						blastp analysis							Statistics of genomes								Gap analysis
Genome Name	NCBI accession id	IMG taxon oid	Technologies used for QD	Num of Gaps	Num of Repeats	Num in Draft	Num in Gap	Num Overlap	0-1500 Repeat Min	0-1500 Repeat Max	0-1500 Repeat Count	0-1500 Sum of Repeats	0-1500 Percent of Genome	1500-3000 Repeat Min	1500-3000 Repeat Max	1500-3000 Repeat Count	1500-3000 Sum of Repeats	1500-3000 Percent of Genome	>3000 Repeat Min	>3000 Repeat Max	>3000 Repeat Count	>3000 Sum of Repeats	>3000 Percent of Genome	tblastn.MISSED genes	tblastn.Genes Low Identity	tblastn.Genes END of Contig	tblastn.Genes Found but SHORT	tblastn.SMALL Gene	tblastn.Genes FOUND at 100%	Number Proteins with Identical Hit	Number Proteins with Similar Hit	Number Proteins with Longer Draft	Number Proteins with Shorter Draft	Number Proteins with Low Quality Hit	Number Proteins with No Hit	Percent Proteins not in Draft	Draft Scaffolds	Pct GC	Total Bases	Bases Mapped to Draft	Missing Bases	Percent DNA Mapped	Percent DNA Missing	Total Proteins	Gap Occurrences	Gap Sum	Gap Mean	Gap STDDev	Gap Min
Lactobacillus_gasseri_ATCC_33323	324831	639633030	k. Illumina Std(PE)LMP	8	325	284	33	8	50	1486	126	90295	3.24	1854	1855	2	3709	0.13	5882	5883	2	11765	0.42	0	0	0	0	0	0	1281	216	211	11	3	33	14.7	7	34.98	1894360	1823401	70959	96.25	3.75	1755	8	70959	8869.88	13457.3	240
Lactobacillus_gasseri_ATCC_33323	324831	639633030	o. Illumina Std(PE)LMP + PacBio	3	325	313	10	2	50	1486	126	90295	3.24	1854	1855	2	3709	0.13	5882	5883	2	11765	0.42	0	0	0	0	0	0	1281	218	209	11	2	0	0.17	3	34.98	1894360	1884888	9472	99.49	0.5	1755	3	9472	3157.33	4612.45	443
Candidatus Methanosphaerula palustris E1-9c	521011	643348525	a. Sanger	5	61	60	1	0	50	1331	58	24309	0.83	0	0	0	0	0	5530	5900	3	17327	0.59	0	0	0	0	0	1	2686	33	47		7	1	2	7	55.4	2922917	2919681	3236	99.9	0.1	2774	6	3236	539.33	624.06	7
Chloroflexus aggregans DSM 9485	326427	643348527	a. Sanger	100	375	314	33	28	50	1488	356	113172	2.41	1507	2245	16	28829	0.61	3344	3502	3	10335	0.22	22	1	1	0	2	0	3726	64	111		25	26	4.1	109	56.4	4684931	4598127	86804	98.1	1.9	3952	105	86804	826.71	1123.56	9
Beutenbergia cavernae HKI 0122, DSM 12333	471853	643692008	a. Sanger	20	102	93	2	7	50	991	100	14278	0.3	0	0	0	0	0	5588	5592	2	11180	0.23	2	3	0	0	0	0	4051	56	93		9	5	2.5	35	73.1	4669183	4656033	13150	99.7	0.3	4214	24	13150	547.92	1403.37	2
Tolumonas auensis DSM 9187	595494	643692052	b. Sanger, 454-FLX	17	88	78	0	10	51	1268	76	19185	0.55	1926	2613	5	11424	0.32	3249	5426	7	29186	0.84	6	0	0	0	2	1								18	49	3471292	3435566	35726	99	1	3173	17	35726	2101.53	2155.09	124
Ferrutens nitratireducens ATCC BAA-14793	279714	643886068	b. Sanger, 454-FLX	17	140	121	1	18	50	1322	116	24100	0.56	1516	2781	16	32374	0.75	3149	5568	8	41842	0.98	0	0	0	0	1	1								20	64.6	4264639	4224353	40286	99.1	0.9	3884	17	40286	2369.76	2339.6	38
Acidimicrobium ferrooxidans ICP, DSM 10331	525909	644736322	c. Sanger, 454-FLX, 454-FLX-PE	11	70	59	3	8	62	1486	61	44718	2.07	1780	1783	7	12467	0.57	5295	5295	2	10590	0.49	4	5	0	1	1	0	1961	33	48		6	11	3.2	10	68.3	2158157	2145540	12617	99.4	0.6	2059	11	12617	1147	908.8	30
Actinosynnema mirum 101, DSM 43827	446462	644736323	b. Sanger, 454-FLX	93	189	173	8	8	50	1469	182	38075	0.46	1839	1979	2	3818	0.04	3503	5499	5	22898	0.27	7	4	0	2	2	0	6706	107	181		53	15	3.5	100	73.7	8248144	8127121	121023	98.5	1.5	7062	99	121023	1222.45	2252.52	4
Actinosynnema mirum 101, DSM 43827	446462	644736323	k. Illumina Std(PE)LMP	48	4706	4650	13	43	50	1469	182	38075	0.46	1839	1979	2	3818	0.04	3503	5499	5	22898	0.27	0	0	0	0	0	0	6450	125	262	144	67	52	7.39	7	73.75	8248144	8235988	12156	99.85	0.15	7100	53	12156	229.36	269.6	15
Actinosynnema mirum 101, DSM 43827	446462	644736323	o. Illumina Std(PE)LMP + PacBio	23	4706	4599	82	25	50	1469	182	38075	0.46	1839	1979	2	3818	0.04	3503	5499	5	22898	0.27	0	0	0	0	0	0	6458	123	264	141	20	2	0.66	7	73.75	8248144	8244332	3812	99.95	0.05	7100	25	171531	6861.24	20027.2	2
Alicyclobacillus acidocaldarius acidocaldarius 104-IA, DSM 446	521098	644736325	b. Sanger, 454-FLX	32	172	143	16	13	50	1493	130	70254	2.19	1546	2130	30	55084	1.71	3508	5110	12	53264	1.66	16	2	1	1	0	6	2966	70	64		25	27	3.7	49	61.9	3205686	3085971	119715	96.3	3.7	3152	39	119715	3069.62	5530.87	1
Alicyclobacillus acidocaldarius acidocaldarius 104-IA, DSM 446	521098	644736325	j. Illumina Std(PE)	80	172	91	21	60	50	1493	130	70254	2.19	1546	2130	30	55084	1.71	3508	5110	12	53264	1.66	29	3	0	5	2	5	2959	13	50	24	60	46	5.71	111	61.89	3205686	3027227	178459	94.43	5.57	3152	85	178459	2099.52	9463.89	8
Alicyclobacillus acidocaldarius acidocaldarius 104-IA, DSM 446	521098	644736325	k. Illumina Std(PE)LMP	38	172	128	18	26	50	1493	84	50109	1.56	1546	2130	18	33872	1.06	3508	5110	9	41169	1.28	29	1	0	4	1	3	3005	13	18	26	51	39	4.3	51	61.9	3205686	3068443	137243	95.7	4.3	3152	44	137243	3119.2	13107.1	2
Anaerococcus prevotii PC 1, DSM 20548	525919	644736326	b. Sanger, 454-FLX	12	114	98	2	14	50	1451	95	22087	1.1	1595	1979	11	18425	0.92	3468	8314	8	46197	2.31	0	0	0	1	0	0	1743	18	59		9	1	3.8	20	35.6	1998633	1971371	27262	98.6	1.4	1830	12	27262	2271.83	3101.74	152
Atopobium parvulum IPP 1246, DSM 20469	521095	644736327	b. Sanger, 454-FLX	1	8	7	0	1	51	650	8	1690	0.1	0	0	0	0	0	0	0	0	0	0	2	0	0	1	0	0	1287	11	57		4	3	4.7	1	45.7	1543805	1543642	163	100	0	1362	1	163	163	0	163
Brachybacterium faecium 6-10, DSM 4810	446465	644736331	a. Sanger	9	46	40	0	6	52	1449	43	22481	0.62	0	0	0	0	0	5428	5692	3	16812	0.46	0	0	0	0	1	0	3081	11	22		5	1	0.9	11	72	3614984	3605024	9960	99.7	0.3	3120	9	9960	1106.67	1857.32	27
Brachybacterium faecium 6-10, DSM 4810	446465	644736331	k. Illumina Std(PE)LMP	2	1690	1689	1	0	52	1449	43	22481	0.62	0	0	0	0	0	5428	5692	3	16812	0.46	0	0	0	0	0	0	2893	38	73	77	15	33	6.32	1	72.1	3614992	3613314	1678	99.95	0.05	3129	2	1678	839	1149.76	26
Brachybacterium faecium 6-10, DSM 4810	446465	644736331	o. Illumina Std(PE)LMP + PacBio	7	1690	1584	100	6	52	1449	43	22481	0.62	0	0	0	0	0	5428	5692	3	16812	0.46	0	0	0	0	0	0	2893	38	73	77	5	1	0.25	1	72.1	3614992	3613314	1678	99.95	0.05	3129	7	154704	22100.6	54718.9	47
Capnocytophaga ochracea VPI 2845, DSM 7271	521097	644736338	b. Sanger, 454-FLX	9	296	290	1	5	50	924	292	34932	1.33	0	0	0	0	0	5505	5611	4	22255	0.85	1	0	0	0	2	0	2064	34	79		3	3	3.9	15	39.6	2612925	2598407	14518	99.4	0.6	2183	11	14518	1319.82	1835.45	1
Catenulispora acidiphila ID139908, DSM 44928	479433	644736339	a. Sanger	110	188	168	6	14	50	1410	178	42428	0.4	1726	2195	5	9719	0.09	3222	5603	5	20873	0.19	43	2	2	4	6	2	8663	110	166		31	59	2.8	131	69.8	10467782	10367646	100136	99	1	9029	125	100136	801.09	1805.85	1
Chitinophaga pinensis UQM 2034, DSM 2588	485918	644736340	b. Sanger, 454-FLX	26	171	143	7	21	50	1465	143	42856	0.46	1509	2050	12	21828	0.23	3039	5261	16	61296	0.67	1	0	0	0	8	1	7157	39	88		10	10	1.5	21	45.2	9127347	9069475	57872	99.4	0.6	7304	27	57872	2143.41	3800.18	5
Chitinophaga pinensis UQM 2034, DSM 2588	485918	644736340	j. Illumina Std(PE)	171	171	112	2	57	50	1465	143	42856	0.46	1509	2050	12	21828	0.23	3039	5261	16	61296	0.67	5	0	0	1	11	3	7129	19	53	69	14	20	2.14	147	45.23	9127347	9020893	106454	98.83	1.17	7304	198	106454	537.65	992.35	2
Chitinophaga pinensis UQM 2034, DSM 2588	485918	644736340	k. Illumina Std(PE)LMP	180	171	127	8	36	50	1465	75	27083	0.3	1509	2050	10	18099	0.2	3039	5261	15	58257	0.64	1	1	0	5	13	4	7075	42	32	106	25	24	2.6	70	45.2	9127347	9049996	77351	99.2	0.8	7304	199	77351	388.7	781.3	2
Cryptobacterium curtum 12-3, DSM 15641	469378	644736346	a. Sanger	2	19	17	0	2	68	1297	16	10308	0.63	0	0	0	0	0	5555	5639	3	16819	1.03	0	0	0	0	2	0	1346	9	8		0	2	0.7	3	50.9	1617796	1609344	8452	99.5	0.5	1365	2	8452	4226	417.19	3931
Cyanothece sp. PCC 8802	395962	644736348	a. Sanger	28	297	280	8	9	50	1364	273	72767	1.51	1524	2374	15	29168	0.6	3057	13061	9	54390	1.13	18	0	0	7	0	0	4330	63	132		22	25	3.9	27	39.8	4803347	4744926	58421	98.8	1.2	4572	29	58421	2014.52	2228.59	12
Desulfohalobium retbaense DSM 5692	485915	644736349	a. Sanger	28	220	203	8	9	50	1499	194	66844	2.29	1502	2488	22	42881	1.47	5645	7412	4	26115	0.89	16	0	0	3	2	0	2429	45	49		7	21	3	32	57.3	2909567	2859446	50121	98.3	1.7	2551	30	50121	1670.7	2544.28	15
Desulfotomaculum acetoxidans 5575, DSM 771	485916	644736351	a. Sanger	150	472	404	12	56	50	1487	381	171183	3.76	1501	2841	83	167356	3.68	3039	3044	8	24328	0.53	76	2	1	5	4	0	3801	141	197		70	88	8.3	186	41.6	4545624	4286992	258632	94.3	5.7	4297	155	258632	1668.59	3049.99	2
Desulfovibrio salexigens DSM 2638	526222	644736353	b. Sanger, 454-FLX	13	134	128	0	6	50	431	129	13167	0.3	0	0	0	0	0	5661	6141	5	30081	0.7	0	0	0	0	0	0	3734	22	74		12	0	2.2	20	47.1	4289847	4275082	14765	99.7	0.3	3842	13	14765	1135.77	1854.98	27
Dickeya dadantii Ech703	579405	644736354	b. Sanger, 454-FLX	14	99	88	0	11	50	1414	91	22579	0.48	0	0	0	0	0	5395	7295	8	47651	1.01	0	0	0	2	3	1	3963	18	16		1	6	0.6	14	55	4679450	4644745	34705	99.3	0.7	4004	15	34705	2313.67	2095.14	5
Dickeya zea Ech1591	561229	644736355	b. Sanger, 454-FLX	58	324	261	7	56	50	1487	291	101558	2.1	1523	2395	20	38548	0.8	3080	6751	13	63883	1.32	0	1	1	2	2	1	4088	59	55		11	7	1.7	61	54.5	4813854	4743390	70464	98.5	1.5	4220	61	70464	1155.15	1502.59	2
Dyadobacter fermentans NS 114, DSM 18053	471854	644736356	a. Sanger	33	62	54	1	7	50	1497	51	29103	0.41	1508	2922	8	15757	0.22	3098	3102	3	9301	0.13	15	0	0	1	15	4	5468	221	125		13	35	3	40	51.5	6967790	6907078	60712	99.1	0.9	5862	37	60712	1640.86	3060.88	11
Eggerthella lenta VPI 0255, DSM 2243	479437	644736358	b. Sanger, 454-FLX	9	84	83	0	1	50	1500	72	30642	0.84	1501	1714	9	14114	0.38	5243	5474	3	16138	0.44	4	0	0	0	1	1	3043	21	39		5	6	1.6	15	64.2	3632260	3610246	22014	99.4	0.6	3114	12	22014	1834.5	2070.74	1
Escherichia coli BL21(DE3)	469008	644736361	b. Sanger, 454-FLX	37	185	147	7	31	51	1477	168	88140	1.92	1504	2761	9	18125	0.39	3201	5509	8	32730	0.71	0	0	0	3	4	0	4069	73	137		8	7	3.5	49	50.8	4570938	4528851	42087	99.1	0.9	4294	40	42087	1052.17	1383.89	5
Geobacillus sp. WCH70	471223	644736370	a. Sanger	58	463	368	51	44	50	1490	355	208273	5.93	1615	2873	95	170915	4.87	3100	3940	13	43871	1.25	52	0	0	3	3	0	3189	91	89		16	58	4.7	76	42.8	3508804	3324831	183973	94.8	5.2	3443	59	183973	3118.19	3366.6	11
Geobacter sp. M21	443144	644736371	a. Sanger	24	176	161	1	14	50	1368	169	40729	0.85	2433	2577	4	9885	0.2	3279	6062	3	13250	0.27	2	0	0	3	1	2	3801	88	190		17	8	5.2	38	60.5	4745806	4710241	35565	99.3	0.7	4104	27	35565	1317.22	1627.53	3
Halomicrobium mukohataei arg-2, DSM 12286	485914	644736372	b. Sanger, 454-FLX	2	360	358	0	2	51	1404	354	59742	1.79	1755	1758	2	3513	0.1	3464	5253	4	19220	0.57	0	2	0	0	1	0	3356	12	13		1	3	0.5	2	65.5	3332349	3329239	3110	99.9	0.1	3385	2	3110	1555	1275.62	653
Halorhabdus utahensis AX-2, DSM 12940	519442	644736373	b. Sanger, 454-FLX	2	72	72	0	0	50	1191	72	9104	0.29	0	0	0	0	0	0	0	0	0	0	0	0	0	0	2	0	2978	21	35		3	2	1.3	5	62.9	3116795	3115350	1445	100	0	3039	2	1445	722.5	218.5	568
Hirschia baltica ATCC 49814	582402	644736375	h. 454-Ti, 454-Ti-PE	7	9	5	0	4	121	886	7	3471	0.09	0	0	0	0	0	6289	6291	2	12580	0.35	0	0	0	1	3	0	3164	10	33		1	4	1.2	11	45.2	3540114	3526670	13444	99.6	0.4	3212	9	13444	1493.78	2524.7	11
Jonesia denitrificans 55134, DSM 20603	471856	644736376	a. Sanger	51	61	55	1	5	50	918	57	11535	0.41	0	0	0	0	0	5526	7205	4	25570	0.92	13	1	0	1	0	1	2442	47	49		9	16	2.9	90	58.4	2749646	2700813	48833	98.2	1.8	2563	70	48833	697.61	1311.1	4
Kangiella koreensis SW-125, DSM 16069	523791	644736377	b. Sanger, 454-FLX	5	47	44	1	2	50	1193	43	7619	0.26	2231	2231	2	4462	0.15	3768	3772	2	7540	0.26	1	0	0	1	1	0	2566	8	57		4	3	2.4	11	43.7	2852073	2839460	12613	99.6	0.4	2638	6	12613	2102.17	2293.29	14
Kosmotoga olearia TBF 19.5.1	521045	644736379	b. Sanger, 454-FLX	17	264	241	9	14	50	1457	234	84329	3.66	1524	2389	26	49337	2.14	3288	3498	4	13597	0.59	1	0	0	1	0	0	2044	34	77		7	2	4	23	41.5	2302126	2280389	21737	99.1	0.9	2164	18	21737	1207.61	1469.81	8
Kytococcus sedentarius 541, DSM 20547	478801	644736380	a. Sanger	20	130	126	1	3	50	1486	126	90295	3.24	1854	1855	2	3709	0.13	5882	5883	2	11765	0.42	3	0	0	1	0	0	2567	28	22		3	4	1.1	44	71.6	2785017	2769708	15309	99.5	0.5	2624	41	15309	373.39	1059.86	4
Leptotrichia buccalis C-1013-b, DSM 1135	523794	644736384	b. Sanger, 454-FLX	27	233	216	4	13	50	1414	219	51783	2.1	1520	1772	9	14859	0.6	3306	5057	5	21715	0.88	2	0	0	1	0	0	2034	55	175		31	3	9.1	46	29.6	2465610	2435814	29796	98.8	1.2	2298	29	29796	1027.45	1347.93	1
Methanocaldococcus fervens AG86	573064	644736385	e. 454-FLX, 454-FLX-PE	15	60	46	0	14	53	723	56	12350	0.81	1555	1561	2	3116	0.2	4954	4955	2	9909	0.65	0	4	0	0	0	2	1579	18	35		2	6	2.6	34	32.2	1507251	1488353	18898	98.7	1.3	1640	23	18898	821.65	1381.67	1
Methylotenera mobilis JLW8	583345	644736388	h. 454-Ti, 454-Ti-PE	11	35	25	2	8	50	1205	33	10016	0.39	0	0	0	0	0	5913	5913	2	11826	0.46	0	0	0	0	0	0	2321	5	17		0	0	0.7	23	45.5	2547570	2530521	17049	99.3	0.7	2343	16	17049	1065.56	1957.05	1
Methylovorus sp. SIP3-4	582744	644736389	h. 454-Ti, 454-Ti-PE	22	47	34	2	11	63	1237	43	13957	0.45	2217	2217	2	4434	0.14	5516	5516	2	11032	0.35	1	1	0	0	3	2	2846	21	35		2	7	1.5	41	54.6	3082007	3065415	16592	99.5	0.5	2911	29	16592	572.14	1088.1	10
Micrococcus luteus Fleming NCTC 2665	465515	644736390	a. Sanger	29	82	72	2	8	51	1491	72	69741	2.78	1505	2937	8	15691	0.62	4151	4153	2	8304	0.33	3	0	0	1	1	0	2199	34	45		4	5	2.4	68	73	2501089	2473540	27549	98.9	1.1	2287	31	27549	888.68	1622.5	9
Nakamurella multipartita Y-104, DSM 44233	479431	644736393	a. Sanger	82	295	267	3	25	50	1492	189	135690	2.23	1502	2978	88	160505	2.64	3054	5445	18	73901	1.21	9	0	0	2	0	1	5187	99	136		25	12	3.2	96	70.9	6060298	6000074	60224	99	1	5459	93	60224	647.57	866.48	2
Paenibacillus sp. JDR-2	324057	644736396	a. Sanger	58	201	156	17	28	50	1192	175	27914	0.38	1557	2941	15	29469	0.41	3109	5422	11	49095	0.68	11	0	0	3	1	1	5952	61	237		22	16	4.4	68	50.3	7184930	7088554	96376	98.7	1.3	6288	72	96376	1338.56	1923.37	1
Pectobacterium carotovorum PC1	561230	644736397	b. Sanger, 454-FLX	14	132	125	0	7	50	1194	126	16732	0.34	1999	1999	2	3998	0.08	5567	5714	4	22529	0.46	0	1	0	1	4	0	4220	21	30		3	6	0.9	20	51.9	4862913	4828774	34139	99.3	0.7	4280	17	34139	2008.18	2156.25	1
Pedobacter heparinus HIM 762-3, DSM 2366	485917	644736398	a. Sanger	91	126	109	8	9	50	1157	111	36236	0.7	1627	2840	11	25531	0.49	4164	5907	4	21841	0.42	33	0	0	2	5	0	3916	83	205		24	40	6.3	101	42	5167383	5052248	115135	97.8	2.2	4268	98	115135	1174.85	2150.44	1
Pedobacter heparinus HIM 762-3, DSM 2366	485917	644736398	j. Illumina Std(PE)	48	126	80	1	45	50	1157	111	36236	0.7	1627	2840	11	25531	0.49	4164	5907	4	21841	0.42	0	0	0	0	1	0	4201	10	28	17	11	1	1.34	75	42.05	5167383	5124076	43307	99.16	0.84	4268	51	43307	849.16	1343.48	1
Pedobacter heparinus HIM 762-3, DSM 2366	485917	644736398	k. Illumina Std(PE)LMP	27	126	100	1	25	50	1157	68	24192	0.47	1627	2840	8	18262	0.35	4164	5907	4	21841	0.42	0	0	0	2	2	0	4216	8	5	22	13	4	1	37	42	5167383	5144603	22780	99.6	0.4	4268	30	22780	759.3	1779.2	5
Ralstonia pickettii 12D	428406	644736400	a. Sanger	27	142	135	0	7	50	1394	113	42895	0.75	1599	2418	15	33740	0.59	3262	22061	14	121699	2.14	0	1	0	1	1	2	5324	36	53		2	5	1.1	44	63.3	5685358	5653292	32066	99.4	0.6	5420	31	32066	1034.39	3728.7	8
Rhizobium leguminosarum bv trifolii WSM1325	395491	644736401	a. Sanger	66	372	361	1	10	50	1499	353	113310	1.52	1516	2583	13	26471	0.35	4237	6956	6	32906	0.44	7	2	0	1	1	1	6711	127	212		50	12	3.9	529	60.8	7418122	7378193	39929	99.5	0.5	7112	73	39929	546.97	862.5	5
Saccharomonospora viridis P101, DSM 43017	471857	644736404	a. Sanger	22	60	57	0	3	50	951	56	12018	0.27	2960	2960	1	2960	0.06	5360	5367	3	16087	0.37	3	2	0	1	2	0	3867	32	30		2	8	1	45	67.3	4308341	4292697	15644	99.6	0.4	3939	42	15644	372.48	915.19	5
Slackia heliotrinireducens RHS1, DSM 20476	471855	644736405	a. Sanger	8	98	91	0	7	50	1481	94	41124	1.29	1558	1559	2	3117	0.09	5356	5357	2	10713	0.33	0	0	0	1	0	0	2679	26	62		5	1	2.5	13	60.2	3165030	3158851	6179	99.8	0.2	2773	10	6179	617.9	1175.85	14
Variovorax paradoxus S110	543728	644736413	b. Sanger, 454-FLX	83	337	305	5	27	50	1438	308	74250	1.09	1504	2806	25	52307	0.77	5650	5650	4	22600	0.33	0	0	0	4	2	4	5871	130	243		39	10	4.6	115	67.5	6754997	6719160	35837	99.5	0.5	6293	92	35837	389.53	570.85	1
Acidaminococcus fermentans VR4, DSM 20731	591001	646311901	c. Sanger, 454-FLX, 454-FLX-PE	42	166	119	11	36	50	1393	147	34627	1.48	1760	2972	15	29700	1.27	3354	5592	4	20016	0.85	10	0	0	9	1	0	2010	15	12		2	20	1.7	57	55.8	2329769	2275981	53788	97.7	2.3	2059	45	53788	1195.29	1513.57	1
Ammonifex degensii KC4	429009	646311904	a. Sanger	29	199	182	3	14	59	1473	154	82910	3.84	1558	2635	41	78437	3.63	3010	3392	4	12805	0.59	3	2	0	1	0	0	2148	22	31		8	6	2	38	59.5	2157067	2137399	19668	99.1	0.9	2215	31	19668	634.45	787.26	3
Archaeoglobus profundus Av18, DSM 5631	572546	646311906	h. 454-Ti, 454-Ti-PE	4	47	43	0	4	51	615	45	7468	0.47	1655	1655	2	3310	0.21	0	0	0	0	0	0	0	0	0	0	0	1853	9	10		0	0	0.5	7	42	1563423	1559241	4182	99.7	0.3	1872	4	4182	1045.5	665.69	469
Archaeoglobus profundus Av18, DSM 5631	572546	646311906	j. Illumina Std(PE)	19	47	34	0	13	51	615	45	7468	0.47	1655	1655	2	3310	0.21	0	0	0	0	0	0	0	0	1	0	0	1848	2	12	7	2	1	1.18	28	42	1563423	1554887	8536	99.45	0.55	1872	20	8536	426.8	697.95	1
Archaeoglobus profundus Av18, DSM 5631	572546	646311906	k. Illumina Std(PE)LMP	4	47	44	0	3	51	615	32	5780	0.37	1655	1655	1	1655	0.11	0	0	0	0	0	0	0	0	0	1	0	1861	1	4	4	1	1	0.5	9	42	1563423	1562382	1041	99.9	0.1	1872	5	1041	208.2	262.7	20
Conexibacter woesei ID131577, DSM 14684	469383	646311917	b. Sanger, 454-FLX	60	65	63	0	2	50	1054	65	12518	0.19	0	0	0	0	0	0	0	0	0	0	2	0	0	1	0	0	5640	84	158		41	3	3.4	129	72.7	6359369	6333774	25595	99.6	0.4	5926	75	25595	341.27	574.27	1
Conexibacter woesei ID131577, DSM 14684	469383	646311917	j. Illumina Std(PE)	932	65	38	8	19	50	1054	65	12518	0.19	0	0	0	0	0	0	0	0	0	0	19	0	6	21	1	1	4550	68	1022	121	117	48	22.07	1075	72.73	6359369	6091439	267930	95.79	4.21	5926	1130	267930	237.11	380.79	1
Conexibacter woesei ID131577, DSM 14684	469383	646311917	k. Illumina Std(PE)LMP	25	3968	3911	33	24	50	1054	65	12519		0	0	0	0	0	0	0	0	0	0	0	0	0	0	0	0	5505	72	189	97	51	36	6.26	3	72.73	6359369	6317212	42157	99.33	0.66	5950	31	42157	1359.9	5979.02	7
Conexibacter woesei ID131577, DSM 14684	469383	646311917	o. Illumina Std(PE)LMP + PacBio	11	3968	3867	88	13	50	1054	65	12519		0	0	0	0	0	0	0	0	0	0	0	0	0	0	0	0	5548	64	184	78	31	7	1.13	3	72.73	6359369	6323217	36152	99.43	0.57	5950	13	96926	7455.85	15856.6	6
Dickeya dadantii Ech586	590409	646311920	e. 454-FLX, 454-FLX-PE	35	127	99	1	27	50	1314	112	26708	0.55	1521	2216	7	12729	0.26	5296	5671	8	43789	0.9	0	3	1	2	3	1	4136	8	36		4	10	1.2	51	53.6	4818394	4767925	50469	99	1	4194	38	50469	1328.13	1776.62	19
Fibrobacter succinogenes S85	59374	646311927	f. 454-FLX, 454-Ti-PE	20	156	128	9	19	50	1186	148	23847	0.62	1739	2681	3	7101	0.18	3322	5933	5	25388	0.66	1	0	0	0	0	0	3105	7	10		0	1	0.4	30	48.1	3842635	3817048	25587	99.3	0.7	3123	22	25587	1163.05	1454.56	7
Fibrobacter succinogenes S85	59374	646311927	j. Illumina Std(PE)	82	156	108	6	42	50	1186	148	23847	0.62	1739	2681	3	7101	0.18	3322	5933	5	25388	0.66	2	4	1	2	1	1	3040	8	38	12	14	11	2.4	66	48.05	3842635	3806915	35720	99.07	0.93	3123	83	35720	430.36	960.88	21
Fibrobacter succinogenes S85	59374	646311927	k. Illumina Std(PE)LMP	34	156	134	0	22	50	1186	73	15570	0.41	1739	2681	2	4420	0.12	3322	5933	4	19455	0.51	0	0	0	1	1	0	3091	1	15	4	10	2	1	29	48.1	3842635	3829739	12896	99.7	0.3	3123	42	12896	307	650.6	1
Geobacillus sp. Y412MC10	481743	646311929	b. Sanger, 454-FLX	19	120	95	12	13	50	1228	109	19843	0.27	1627	2078	3	5732	0.08	3066	5380	8	35658	0.5	7	0	0	5	4	1	5974	87	208		19	17	3.9	33	51.2	7121665	7074957	46708	99.3	0.7	6305	22	46708	2123.09	2241.58	5
Geobacillus sp. Y412MC61	544556	646311930	b. Sanger, 454-FLX	56	386	314	9	63	50	1484	320	104040	2.83	1575	2388	56	103044	2.8	3109	3727	10	33960	0.92	3	0	0	2	6	2	3468	51	61		12	13	2.4	61	52.3	3667901	3593704	74197	98	2	3605	57	74197	1301.7	1340.28	2
Geodermatophilus obscurus G-20, DSM 43160	526225	646311931	b. Sanger, 454-FLX	35	270	265	1	4	50	1417	261	55907	1.05	1543	2751	4	8586	0.16	5636	6408	5	29766	0.55	1	5	0	1	0	3	4871	70	109		25	10	2.8	39	74	5322497	5298566	23931	99.6	0.4	5085	40	23931	598.28	986.2	18
Gordonia bronchialis DSM 43247	526226	646311932	b. Sanger, 454-FLX	40	238	210	8	20	50	1490	195	101941	1.92	1503	2650	30	54510	1.03	3042	5727	13	52732	0.99	7	1	1	2	1	0	4752	92	134		15	12	3.2	39	67	5290012	5246754	43258	99.2	0.8	5005	42	43258	1029.95	1592.2	3
Haliangium ochraceum SMP-2, DSM 14365	502025	646311933	a. Sanger	41	510	491	3	16	50	1476	387	115887	1.22	1516	2979	75	154520	1.63	3008	15501	48	251205	2.65	1	0	0	1	0	1	6637	92	122		11	3	2	45	69.5	9446314	9421209	25105	99.7	0.3	6865	45	25105	557.89	958.99	4
Haloterrigena turkmenica VKM, DSM 5511	543526	646311934	b. Sanger, 454-FLX	6	140	135	0	5	51	1333	132	43832	0.8	1584	2169	5	8549	0.15	3241	5424	3	13996	0.25	0	1	0	2	1	0	4953	76	162		18	4	3.5	16	64.3	5440782	5434493	6289	99.9	0.1	5213	7	6289	898.43	1519.3	15
Haloterrigena turkmenica VKM, DSM 5511	543526	646311934	j. Illumina Std(PE)	132	140	102	1	37	51	1333	132	43832	0.8	1584	2169	5	8549	0.15	3241	5424	3	13996	0.25	0	4	0	8	5	7	4990	6	98	35	60	24	4.16	143	64.26	5440782	5400341	40441	99.26	0.74	5213	178	40441	227.2	702.44	2
Haloterrigena turkmenica VKM, DSM 5511	543526	646311934	k. Illumina Std(PE)LMP	78	140	107	3	30	51	1333	65	23516	0.43	1584	2169	4	6945	0.13	3241	5424	3	13996	0.26	0	7	1	1	5	8	5069	4	50	19	49	22	2.7	42	64.3	5440782	5410368	30414	99.4	0.6	5213	102	30414	298.2	879.4	1
Halothiobacillus neapolitanus c2, ATCC 23641	555778	646311935	b. Sanger, 454-FLX	12	168	155	1	12	50	1398	162	34076	1.31	1594	1597	2	3191	0.12	3595	5737	4	18663	0.72	8	0	0	0	3	2	2357	24	18		2	13	1.4	18	54.7	2582886	2567654	15232	99.4	0.6	2414	15	15232	1015.47	1561.46	2
Klebsiella varlicola	640131	646311937	i. 454-Ti, 454-Ti-PE, Illumina Std(PE)	30	157	125	4	28	50	1406	143	27508	0.5	1889	2205	4	8000	0.14	3070	5644	10	37020	0.67	0	1	0	2	2	2								39	57.6	5458505	5406083	52422	99	1	5041	33	52422	1588.55	2144.26	1
Kribbella flavida DSM 17836	479435	646311938	b. Sanger, 454-FLX	15	114	110	0	4	50	1431	108	17759	0.23	1750	2230	4	7961	0.1	5476	5477	2	10953	0.14	0	0	0	1	1	1	6849	72	128		8	3	2	33	70.6	7579488	7570804	8684	99.9	0.1	7060	18	8684	482.44	1129.99	12
Methanocaldococcus vulcanius M7, DSM 12094	579137	646311944	b. Sanger, 454-FLX	6	125	123	0	2	52	1169	123	32988	1.87	0	0	0	0	0	4967	4970	2	9937	0.56	7	0	0	1	1	0	1718	5	21		5	10	2	6	31.6	1761737	1741541	20196	98.9	1.1	1759	6	20196	3366	4112.13	33
Pectobacterium wasabiae WPP163	561231	646311947	b. Sanger, 454-FLX	50	180	161	2	17	50	1410	172	39293	0.77	1701	2006	3	5713	0.11	3419	5699	5	25962	0.51	14	0	1	4	4	0	4307	61	98		21	23	3.1	79	50.5	5063892	5000006	63886	98.7	1.3	4510	55	63886	1161.56	1813.22	2
Pirellula staleyi DSM 6068	530564	646311948	b. Sanger, 454-FLX	4	65	60	0	5	51	1337	56	24190	0.39	1897	2976	3	7823	0.12	3228	4627	6	21916	0.35	0	1	0	2	2	3	4629	26	52		1	8	1.3	8	57.5	6196199	6189999	6200	99.9	0.1	4716	5	6200	1240	840.5	24
Rhodothermus marinus R-10, DSM 4252	518766	646311949	b. Sanger, 454-FLX	5	161	158	0	3	50	1200	152	52679	1.55	1695	1966	7	12676	0.37	3088	3088	2	6176	0.18	0	0	0	0	2	0	2843	35	36		7	2	1.5	4	64.3	3386737	3384519	2218	99.9	0.1	2923	5	2218	443.6	442.07	150
Sebaldella termitidis ATCC 33386	526218	646311952	b. Sanger, 454-FLX	16	210	198	3	9	50	1469	179	71268	1.58	1585	2307	15	28058	0.62	3225	6235	16	74922	1.66	8	0	0	5	1	0	3843	70	237		34	14	6.8	28	33.4	4486650	4462479	24171	99.5	0.5	4198	19	24171	1272.16	1670.14	1
Sphaerobacter thermophilus 4ac11, DSM 20745	479434	646311953	a. Sanger	12	170	161	1	8	50	1304	161	54569	1.36	1718	2419	6	13111	0.32	3461	3462	3	10385	0.26	0	0	0	1	1	0	3462	22	33		4	2	1.1	15	68.1	3993764	3988112	5652	99.9	0.1	3523	13	5652	434.77	909.16	2
Spirosoma linguale DSM 74	504472	646311954	b. Sanger, 454-FLX	49	239	221	1	17	50	1475	189	72734	0.85	1506	2830	48	103614	1.22	5387	5394	2	10781	0.12	4	0	0	3	4	0	6988	52	67		1	11	1.1	74	50.1	8491258	8457656	33602	99.6	0.4	7119	58	33602	579.35	1173.71	1
Streptobacillus moniliformis 9901, DSM 12112	519441	646311956	b. Sanger, 454-FLX	35	168	134	23	11	51	1477	147	68713	4.1	1566	2134	18	33702	2.01	3245	5095	3	13432	0.8	37	0	0	0	0	1	1271	92	104		34	38	11.4	45	26.3	1673280	1531656	141624	91.5	8.5	1539	37	141624	3827.68	5473.37	5
Streptosporangium roseum NI 9100, DSM 43021	479432	646311958	a. Sanger	327	493	434	29	30	50	1300	470	120699	1.16	1512	2317	18	32834	0.31	3673	5694	5	26117	0.25	42	0	0	6	4	0	8397	283	384		107	52	5.9	397	70.9	10369518	10071790	297728	97.1	2.9	9223	373	297728	798.2	1520.71	1
Streptosporangium roseum NI 9100, DSM 43021	479432	646311958	j. Illumina Std(PE)	1232	493	357	8	128	50	1300	470	120699	1.16	1512	2317	18	32834	0.31	3673	5694	5	26117	0.25	18	9	5	26	14	4	7455	98	1007	361	226	76	18.11	1219	70.86	10369518	10065612	303906	97.07	2.93	9223	1679	303906	181	460.96	1
Streptosporangium roseum NI 9100, DSM 43021	479432	646311958	k. Illumina Std(PE)LMP	604	493	367	16	110	50	1300	201	71366	0.69	1512	2317	13	23824	0.23	3673	5694	4	20423	0.2	16	9	0	32	9	6	8297	74	320	264	196	72	9.2	133	70.9	10369518	10209118	160400	98.5	1.5	9223	698	160400	229.8	604.5	1
Sulfurospirillum deleyianum DSM 6946	525898	646311960	b. Sanger, 454-FLX	13	64	51	0	13	50	1449	44	14998	0.65	1527	2653	17	32880	1.42	5575	5655	3	16881	0.73	1	0	0	1	1	0	2176	19	80		5	3	3.9	19	39	2306351	2287511	18840	99.2	0.8	2283	13	18840	1449.23	1443.13	93
Thermanaerovibrio acidaminovorans DSM 6589	525903	646311961	b. Sanger, 454-FLX	5	33	29	0	4	79	1213	23	5199	0.28	1552	2807	7	14440	0.78	3226	5041	3	13306	0.71	0	0	0	0	0	0	1682	25	53		2	0	3.1	11	63.8	1848474	1839976	8498	99.5	0.5	1762	5	8498	1699.6	1876.53	726
Thermobaculum terrenum YNP1, ATCC BAA-798	525904	646311962	b. Sanger, 454-FLX	9	143	127	8	8	50	1233	139	44554	1.43	0	0	0	0	0	5038	5038	4	20152	0.64	10	0	0	1	1	0	2793	21	36		5	12	1.8	10	53.5	3101581	3081123	20458	99.3	0.7	2867	9	20458	2273.11	2360.69	62
Thermomonospora curvata DSM 43183	471852	646311963	b. Sanger, 454-FLX	111	81	72	3	6	50	1270	75	22205	0.39	1530	1530	2	3060	0.05	5770	6286	4	23731	0.42	6	0	0	2	3	1	4571	128	205		65	12	5.7	159	71.6	5639016	5537420	101596	98.2	1.8	4981	120	101596	846.63	1266.98	4
Thermotoga naphthophila RKU-10	590168	646311964	e. 454-FLX, 454-FLX-PE	18	31	13	1	17	75	1248	26	10081	0.55	1725	2486	5	10156	0.56	0	0	0	0	0	3	0	0	0	1	0	1796	12	11		0	4	0.8	23	46.1	1809823	1794527	15296	99.2	0.8	1823	19	15296	805.05	752.6	2
Veillonella parvula Te3, DSM 2008	479436	646311965	a. Sanger	6	47	40	2	5	57	1190	39	8880	0.41	1778	1860	2	3638	0.17	3172	5596	6	24615	1.15	6	0	1	0	0	0	1752	17	80		6	7	5	10	38.6	2132142	2112163	19979	99.1	0.9	1862	6	19979	3329.83	2520.94	42
Xylanimonas cellulosilytica DSM 15894	446471	646311968	a. Sanger	26	87	80	1	6	50	1440	80	23515	0.61	1541	3000	3	6082	0.15	3001	5653	4	19878	0.51	3	0	0	0	0	0	3384	28	46		2	3	1.5	31	72.5	3831380	3816042	15338	99.6	0.4	3463	31	15338	494.77	969.99	2
Zymomonas mobilis NCIB 11163	622759	646311969	b. Sanger, 454-FLX	6	35	32	0	3	64	1104	30	11297	0.5	1918	1918	2	3836	0.17	5704	5776	3	17255	0.77	6	1	0	0	2	0	1876	9	20		2	9	1.6	11	46.6	2223520	2206924	16596	99.3	0.7	1916	6	16596	2766	2274.98	393
Aciduliprofundum boonei strain 1	439481	646564501	i. 454-Ti, 454-Ti-PE, Illumina Std(PE)	17	21	8	0	13	53	1002	21	14129	0.95	0	0	0	0	0	0	0	0	0	0	0	0	0	0	0	0								71	39.2	1486778	1474449	12329	99.2	0.8	1558	24	12329	513.71	414.76	1
Allochromatium vinosum DSM 180	572477	646564502	h. 454-Ti, 454-Ti-PE	40	82	52	1	29	50	1431	73	42208	1.15	1707	1710	3	5126	0.13	3312	5620	6	26754	0.72	0	0	0	2	1	1								66	64.2	3669074	3617629	51445	98.6	1.4	3262	45	51445	1143.22	1362.15	11
Aminobacterium colombiense DSM 12261	572547	646564503	h. 454-Ti, 454-Ti-PE	6	18	11	0	7	63	1261	10	6318	0.31	1560	1560	1	1560	0.07	3208	5004	7	26921	1.35	0	0	0	2	0	0	1863	9	38		2	2	2.2	22	45.3	1980592	1959470	21122	98.9	1.1	1914	6	21122	3520.33	1869.65	1201
Arcanobacterium haemolyticum DSM 20595	644284	646564505	i. 454-Ti, 454-Ti-PE, Illumina Std(PE)	26	72	44	0	28	52	1473	68	34250	1.72	0	0	0	0	0	5361	5519	4	21869	1.1	4	0	1	1	9	0								36	53.1	1986154	1940724	45430	97.7	2.3	1855	27	45430	1682.59	1716.06	8
Arcanobacterium haemolyticum DSM 20595	644284	646564505	j. Illumina Std(PE)	47	72	40	0	32	52	1473	68	34250	1.72	0	0	0	0	0	5361	5519	4	21869	1.1	0	0	2	2	4	1	1788	3	19	33	3	9	3.45	52	53.13	1986154	1940561	45593	97.7	2.3	1855	50	45593	911.86	1401.42	14
Arcobacter nitrofigilis DSM 07299	572480	646564506	h. 454-Ti, 454-Ti-PE	35	131	92	2	37	50	1495	116	36225	1.13	1603	2160	11	20836	0.65	3687	5879	4	20809	0.65	1	0	0	3	0	0								56	28.4	3192235	3147796	44439	98.6	1.4	3149	40	44439	1110.98	1535.52	2
Arcobacter nitrofigilis DSM 07299	572480	646564506	j. Illumina Std(PE)	74	131	51	9	71	50	1495	116	36225	1.13	1603	2160	11	20836	0.65	3687	5879	4	20809	0.65	0	0	1	1	2	0	3073	5	47	17	3	4	2.25	163	28.36	3192235	3139018	53217	98.33	1.67	3149	83	53217	641.17	1087.85	1
Arcobacter nitrofigilis DSM 07299	572480	646564506	k. Illumina Std(PE)LMP	53	131	83	2	46	50	1495	76	24711	0.77	1603	2160	8	15542	0.49	3687	5879	4	20809	0.65	0	0	0	1	4	0	3079	5	25	20	15	5	2.1	45	28.4	3192235	3160598	31637	99	1	3149	68	31637	465.3	993.8	1
Bacillus tusciae T2, DSM 2912	562970	646564511	b. Sanger, 454-FLX	35	226	174	10	42	51	1485	164	60820	1.79	1575	2756	57	117361	3.46	3187	5106	5	20489	0.6	5	3	0	0	5	0	3197	54	34		22	13	2.1	43	59.1	3384766	3308639	76127	97.8	2.2	3320	36	76127	2114.64	1899.12	17
Bacillus tusciae T2, DSM 2912	562970	646564511	j. Illumina Std(PE)	137	226	120	3	103	51	1485	164	60820	1.79	1575	2756	57	117361	3.46	3187	5106	5	20489	0.6	1	4	3	6	6	1	3101	10	81	46	61	21	6.3	160	59.11	3384766	3246171	138595	95.91	4.09	3320	146	138595	949.28	1109.02	11
Bacillus tusciae T2, DSM 2912	562970	646564511	k. Illumina Std(PE)LMP	76	226	169	2	55	51	1485	110	43746	1.29	1575	2756	36	76147	2.25	3187	5106	5	20489	0.61	1	1	1	4	7	4	3186	10	12	61	33	18	3.7	82	59.1	3384766	3332106	52660	98.4	1.6	3320	79	52660	666.6	884.7	3
Brachyspira murdochii DSM 12563	526224	646564514	k. Illumina Std(PE)LMP	18	4704	4567	131	6	50	1307	187	31126	0.96	1504	2522	2	4026	0.12	3591	34928	4	93934	2.89	0	0	0	0	0	0	2754	6	46	22	10	15	3.25	7	27.75	3241804	3139681	102123	96.84	3.15	2853	19	102123	5374.89	10747.2	8
Brachyspira murdochii DSM 12563	526224	646564514	o. Illumina Std(PE)LMP + PacBio	6	4704	4646	50	8	50	1307	187	31126	0.96	1504	2522	2	4026	0.12	3591	34928	4	93934	2.89	0	0	0	0	0	0	2774	2	39	23	3	2	0.77	13	27.75	3241804	3193314	48490	98.5	1.5	2853	7	48490	6927.14	7442.67	1
Burkholderia sp. Strain CCGE1002	640511	646564515	i. 454-Ti, 454-Ti-PE, Illumina Std(PE)	73	328	249	5	74	50	1481	276	122559	1.55	1513	2659	30	57725	0.73	3259	5827	22	102301	1.29	2	1	1	1	5	3								119	63.3	7884858	7761481	123377	98.4	1.6	7162	77	123377	1602.3	1669.54	1
Cellulomonas flavigena 134, DSM 20109	446466	646564520	a. Sanger	196	83	79	2	2	50	1499	81	36130	0.87	0	0	0	0	0	5486	5486	2	10972	0.26	22	0	0	0	1	0	3237	155	238		68	23	8.8	236	74.3	4123179	3954275	168904	95.9	4.1	3721	214	168904	789.27	1136.2	4
Cellulomonas flavigena 134, DSM 20109	446466	646564520	k. Illumina Std(PE)LMP	34	2252	2227	6	19	50	1499	81	36130	0.87	0	0	0	0	0	5486	5486	2	10972	0.26	0	0	0	0	0	0	3523	27	57	79	31	13	4.82	3	74.29	4123179	4099501	23678	99.42	0.57	3730	36	23678	657.72	743.43	3
Cellulomonas flavigena 134, DSM 20109	446466	646564520	o. Illumina Std(PE)LMP + PacBio	30	2252	2223	8	21	50	1499	81	36130	0.87	0	0	0	0	0	5486	5486	2	10972	0.26	0	0	0	0	0	0	3536	23	61	66	20	4	1.61	3	74.29	4123179	4106105	17074	99.58	0.41	3730	32	19349	604.66	950.72	1
Coraliomargarita akajimensis DSM 45221	583355	646564524	h. 454-Ti, 454-Ti-PE	27	164	134	4	26	50	1406	162	28011	0.74	0	0	0	0	0	5865	5865	2	11730	0.31	7	1	0	0	9	0	3053	32	41		2	17	1.9	41	53.6	3750771	3726554	24217	99.4	0.6	3145	32	24217	756.78	1387.03	4
Dehalococcoides sp. Strain GT	633145	646564526	i. 454-Ti, 454-Ti-PE, Illumina Std(PE)	9	10	5	0	5	51	1216	6	4225	0.31	1688	1688	2	3376	0.24	24735	24737	2	49472	3.63	0	0	0	0	1	0								13	47.3	1360154	1307808	52346	96.2	3.8	1427	9	52346	5816.22	10127.9	38
Denitrovibrio acetiphilus DSM 12809	522772	646564527	b. Sanger, 454-FLX	33	133	104	1	28	50	1363	95	56936	1.76	1526	2694	34	70271	2.18	5538	10307	4	31690	0.98	1	0	0	0	0	0	2860	28	114		16	1	4.3	45	42.5	3222077	3193855	28222	99.1	0.9	3019	35	28222	806.34	703.61	18
Desulfovibrio alkaliphilus AHT2	589865	646564528	e. 454-FLX, 454-FLX-PE	46	279	230	0	49	51	1389	255	50393	1.62	1534	2658	22	45681	1.47	5387	5387	2	10774	0.34	2	0	0	1	1	0								66	60.3	3097763	3027725	70038	97.7	2.3	2695	50	70038	1400.76	1318.35	1
Ferroglobus placidus	589924	646564534	e. 454-FLX, 454-FLX-PE	29	63	39	0	24	57	1246	63	28231	1.28	0	0	0	0	0	0	0	0	0	0	0	0	0	0	1	0								44	44.1	2196266	2176883	19383	99.1	0.9	2595	38	19383	510.08	402.77	1
Meiothermus ruber DSM 1279	504728	646564545	b. Sanger, 454-FLX	4	79	74	0	5	51	1498	71	21419	0.69	2423	2709	4	10264	0.33	3377	7041	4	20837	0.67	0	0	0	1	2	0	3024	15	30		2	3	1.1	6	63.4	3097457	3084782	12675	99.6	0.4	3074	4	12675	3168.75	3871.31	118
Meiothermus silvanus VI-R2, DSM 9946	526227	646564546	b. Sanger, 454-FLX	27	462	436	7	19	50	1412	429	306442	8.23	1503	2619	14	29090	0.78	3321	20084	19	142732	3.83	7	0	1	3	1	1	3532	77	70		18	14	2.7	30	62.7	3721669	3687860	33809	99.1	0.9	3711	28	33809	1207.46	1649.5	7
Methanocaldococcus sp. Infernus ME	573063	646564547	h. 454-Ti, 454-Ti-PE	31	85	62	0	23	50	1229	81	31059	2.33	1767	1774	2	3541	0.26	4951	4952	2	9903	0.74	1	0	0	0	1	2								54	33.6	1328193	1300458	27735	97.9	2.1	1476	39	27735	711.15	1093.78	1
Methanocaldococcus sp. FS406-22	644281	646564548	i. 454-Ti, 454-Ti-PE, Illumina Std(PE)	17	102	89	0	13	50	1485	100	27360	1.54	0	0	0	0	0	4888	4888	2	9776	0.55	0	2	0	2	0	2								33	32	1773136	1753723	19413	98.9	1.1	1875	17	19413	1141.94	1431.33	409
Methanohalophilus mahii DSM 5219	547558	646564550	b. Sanger, 454-FLX	6	37	32	0	5	50	1298	34	16859	0.83	0	0	0	0	0	5436	5762	3	16959	0.84	0	0	0	0	1	0	1942	22	43		3	1	2.3	5	42.6	2012424	2000481	11943	99.4	0.6	2011	6	11943	1990.5	1882.19	151
Methylotenera sp. 301	666681	646564551	i. 454-Ti, 454-Ti-PE, Illumina Std(PE)	11	37	26	0	11	80	1371	23	9172	0.29	1564	2474	11	23272	0.76	6087	6269	3	18554	0.6	0	0	0	0	0	0								37	42.6	3059871	3040159	19712	99.4	0.6	2799	11	19712	1792	1739.21	213
Natrialba magadii ATCC 43099	547559	646564555	b. Sanger, 454-FLX	6	243	237	1	5	50	1492	227	44537	1	1662	2825	11	22185	0.49	3386	3465	5	17161	0.38	0	1	0	0	3	3								13	61.1	4443643	4436399	7244	99.8	0.2	4306	6	7244	1207.33	1510.07	49
Planctomyces limnophilus DSM 3776	521674	646564559	b. Sanger, 454-FLX	7	100	98	1	1	50	1092	98	13186	0.24	2187	2188	2	4375	0.08	0	0	0	0	0	18	0	0	5	5	3	4140	28	79		5	31	2.7	14	53.7	5460085	5444949	15136	99.7	0.3	4283	7	15136	2162.29	3113.67	72
Sanguibacter keddieii, ST-74, DSM 10542	446469	646564565	a. Sanger	34	46	41	0	5	53	474	42	5175	0.12	0	0	0	0	0	5575	5936	4	23181	0.54	2	0	0	2	1	1	3589	46	71		5	6	2.2	49	71.9	4253404	4230349	23055	99.5	0.5	3717	42	23055	548.93	1150.31	1
Segniliparus rotundus DSM 44985	640132	646564566	i. 454-Ti, 454-Ti-PE, Illumina Std(PE)	16	84	62	9	13	50	1361	82	21937	0.69	2859	2879	2	5738	0.18	0	0	0	0	0	0	1	0	0	0	0	3031	20	19		1	1	0.7	28	66.8	3157527	3145906	11621	99.6	0.4	3072	16	11621	726.31	689.86	49
Segniliparus rotundus DSM 44985	640132	646564566	j. Illumina Std(PE)	136	84	59	8	17	50	1361	82	21937	0.69	2859	2879	2	5738	0.18	0	0	0	0	0	2	1	0	1	1	0	2818	14	176	46	13	5	7.81	194	66.79	3157527	3127091	30436	99.04	0.96	3072	151	30436	201.56	371.75	2
Segniliparus rotundus DSM 44985	640132	646564566	k. Illumina Std(PE)LMP	89	84	71	6	7	50	1361	46	14470	0.46	2859	2879	2	5738	0.18	0	0	0	0	0	0	0	0	6	3	2	2904	9	52	50	46	11	5.2	16	66.8	3157527	3140567	16960	99.5	0.5	3072	108	16960	157	229.6	1
Sideroxydans lithotrophicus ES-1	580332	646564569	h. 454-Ti, 454-Ti-PE	9	33	23	0	10	52	1305	31	11154	0.37	0	0	0	0	0	5642	5643	2	11285	0.37	0	2	0	0	2	2								17	57.5	3003656	2986598	17058	99.4	0.6	2972	11	17058	1550.73	2084.99	7
Stackebrandtia nassauensis LLR-40K-21, DSM 44728	446470	646564571	b. Sanger, 454-FLX	6	49	48	0	1	50	571	47	7268	0.1	0	0	0	0	0	5365	5367	2	10732	0.15	0	0	0	0	2	0	6322	42	66		7	2	1.2	10	68.1	6841557	6835647	5910	99.9	0.1	6439	7	5910	844.29	1420.4	5
Staphylothermus hellenicus	591019	646564573	h. 454-Ti, 454-Ti-PE	3	27	25	0	2	51	225	27	2963	0.18	0	0	0	0	0	0	0	0	0	0	0	2	0	0	0	0								7	36.8	1580347	1579163	1184	99.9	0.1	1647	5	1184	236.8	316.55	2
Therminocola sp. JR	635013	646564578	i. 454-Ti, 454-Ti-PE, Illumina Std(PE)	69	248	180	0	68	50	1339	199	42688	1.35	1627	2968	36	66407	2.1	3109	3607	13	42974	1.36	1	1	0	0	1	0								86	45.9	3157416	3047032	110384	96.5	3.5	3007	71	110384	1554.7	1150.94	1
Thermoanaerobacter italicus Ab9 DSM 9252	580331	646564579	h. 454-Ti, 454-Ti-PE	74	144	61	21	62	51	1417	111	60317	2.46	1581	2478	30	55754	2.27	4928	4991	3	14906	0.6	2	1	0	5	0	0								111	34.1	2451061	2342382	108679	95.6	4.4	2382	81	108679	1341.72	1135.82	3
Thermobispora bispora DSM 43833	469371	646564581	a. Sanger	29	80	75	1	4	50	1169	73	13319	0.31	1603	1943	4	7090	0.16	3066	3103	3	9271	0.22	2	0	0	1	1	0	3473	31	75		4	4	2.3	51	72.4	4189976	4173991	15985	99.6	0.4	3587	34	15985	470.15	941.27	2
Thermocrinis albus DSM 14484	638303	646564582	i. 454-Ti, 454-Ti-PE, Illumina Std(PE)	7	63	54	0	9	50	1246	61	17821	1.18	1647	1648	2	3295	0.21	0	0	0	0	0	0	0	0	0	1	0	1605	9	5		1	1	0.4	9	46.9	1500577	1495356	5221	99.7	0.3	1621	7	5221	745.86	361.18	44
Thermosphaera aggregans M11TL, DSM 11486	633148	646564583	i. 454-Ti, 454-Ti-PE, Illumina Std(PE)	2	11	9	0	2	53	336	11	1382	0.1	0	0	0	0	0	0	0	0	0	0	1	0	0	0	1	0	1410	0	2		1	2	0.4	2	46.7	1316595	1315931	664	99.9	0.1	1415	2	664	332	223.45	174
Thermosphaera aggregans M11TL, DSM 11486	633148	646564583	j. Illumina Std(PE)	2	11	11	0	0	53	336	11	1382	0.1	0	0	0	0	0	0	0	0	0	0	0	0	0	0	0	0	1404	5	2	3	1	0	0.42	2	46.73	1316595	1316513	82	99.99	0.01	1415	2	82	41	15.56	30
Thermosphaera aggregans M11TL, DSM 11486	633148	646564583	k. Illumina Std(PE)LMP	5	11	11	0	0	53	336	8	900	0.07	0	0	0	0	0	0	0	0	0	0	0	0	0	0	0	0	1403	3	2	4	3	0	0.6	3	46.7	1316595	1316388	207	100	0	1415	6	207	34.5	18.7	1
Thiomonas intermedia K12	75379	646564585	h. 454-Ti, 454-Ti-PE	56	187	122	4	61	50	1480	151	62200	1.79	1572	2674	30	63931	1.84	3526	3948	6	22253	0.64	0	3	0	1	4	8								93	63.8	3462114	3381681	80433	97.7	2.3	3275	62	80433	1297.31	1375.28	1
Truepera radiovictrix DSM 17093	649638	646564586	i. 454-Ti, 454-Ti-PE, Illumina Std(PE)	42	70	38	0	32	50	1353	63	29393	0.9	1585	2413	5	10408	0.31	3248	3248	2	6496	0.19	2	0	1	0	1	1								83	68.1	3260399	3221173	39226	98.8	1.2	2989	45	39226	871.69	843.46	1
Tsukamurella paurometabola DSM 20162	521096	646564587	b. Sanger, 454-FLX	7	107	104	0	3	52	1497	78	69228	1.54	1501	2516	23	44729	0.99	4553	5553	6	29322	0.65	0	0	0	2	0	0	4216	46	68		4	2	1.7	8	68.4	4479724	4476668	3056	99.9	0.1	4336	7	3056	436.57	282.84	147
Sulfolobus solfataricus 98/2	555311	646862347	b. Sanger, 454-FLX	49	569	499	11	59	50	1452	565	270812	10.14	1767	1921	4	7380	0.27	0	0	0	0	0	2	1	0	1	3	2								56	35.8	2668974	2631114	37860	98.6	1.4	2976	51	37860	742.35	869.63	1
Acetohalobium arabaticum Z-7288, DSM 5501	574087	648028002	g. 454-Ti	65	268	189	10	69	50	1459	237	64392	2.6	1539	2714	26	48088	1.94	3230	5573	5	23172	0.93	3	0	0	0	0	0	2242	34	56		16	3	3.2	82	36.6	2469596	2391132	78464	96.8	3.2	2351	67	78464	1171.1	1380.1	19
Acetohalobium arabaticum Z-7288, DSM 5501	574087	648028002	j. Illumina Std(PE)	116	268	141	5	122	50	1459	237	64392	2.6	1539	2714	26	48088	1.94	3230	5573	5	23172	0.93	0	0	1	0	2	0	2272	7	38	8	23	3	3.06	148	36.63	2469596	2385747	83849	96.6	3.4	2351	119	83849	704.61	1019.34	17
Desulfarculus baarsii DSM 2075	644282	648028023	i. 454-Ti, 454-Ti-PE, Illumina Std(PE)	36	142	98	12	32	51	1347	140	47420	1.29	2056	2056	2	4112	0.11	0	0	0	0	0	0	0	0	0	1	1								57	65.7	3655730	3629696	26034	99.3	0.7	3298	38	26034	685.11	540.94	2
Ferrimonas balearica PAT, DSM 9799	550540	648028026	b. Sanger, 454-FLX	15	134	123	1	10	56	1255	124	27417	0.64	1800	2911	3	7621	0.17	3417	5631	7	35848	0.83	0	0	0	2	1	1	3735	24	29		5	4	1	16	60.2	4279159	4248743	30416	99.3	0.7	3797	15	30416	2027.73	1838.39	120
Ignisphaera aggregans AQ1.S1, DSM 17230	583356	648028035	h. 454-Ti, 454-Ti-PE	4	51	49	0	2	50	360	51	6852	0.36	0	0	0	0	0	0	0	0	0	0	0	0	0	0	0	0	1975	9	14		0	0	0.7	21	35.7	1875953	1875525	428	100	0	1998	7	428	61.14	95.43	9
Ignisphaera aggregans AQ1.S1, DSM 17230	583356	648028035	j. Illumina Std(PE)	19	51	42	1	8	50	360	51	6852	0.36	0	0	0	0	0	0	0	0	0	0	5	0	0	2	1	0	1953	7	19	4	7	8	1.9	38	35.69	1875953	1868958	6995	99.63	0.37	1998	23	6995	304.13	763.57	4
Ignisphaera aggregans AQ1.S1, DSM 17230	583356	648028035	k. Illumina Std(PE)LMP	19	51	42	1	8	50	360	30	4135	0.22	0	0	0	0	0	0	0	0	0	0	5	0	0	2	1	0	1951	7	12	6	14	8	2	39	35.7	1875953	1869816	6137	99.7	0.3	1998	23	6137	266.8	770	2
Olsenella uli VPI, DSM 7084	633147	648028047	i. 454-Ti, 454-Ti-PE, Illumina Std(PE)	14	37	32	0	5	53	953	37	8591	0.41	0	0	0	0	0	0	0	0	0	0	0	1	1	0	1	0	1591	36	143		1	3	8.3	167	64.7	2051896	2047210	4686	99.8	0.2	1774	15	4686	312.4	260.74	7
Olsenella uli VPI, DSM 7084	633147	648028047	j. Illumina Std(PE)	34	37	27	0	10	53	953	37	8591	0.41	0	0	0	0	0	0	0	0	0	0	4	1	1	2	1	0	1729	4	22	6	4	9	2.31	30	64.7	2051896	2042018	9878	99.52	0.48	1774	38	9878	259.95	448.5	2
Olsenella uli VPI, DSM 7084	633147	648028047	k. Illumina Std(PE)LMP	44	37	27	1	9	53	953	25	7028	0.34	0	0	0	0	0	0	0	0	0	0	4	0	0	3	0	0	1705	4	26	21	11	7	3.7	14	64.7	2051896	2042772	9124	99.6	0.4	1774	60	9124	152.1	335.9	1
Spirochaeta smaragkinae DSM 11293	573413	648028052	h. 454-Ti, 454-Ti-PE	41	123	78	8	37	50	1404	113	58668	1.26	1649	2066	8	14469	0.31	3250	3250	2	6500	0.13	0	0	0	6	5	2								70	49	4654051	4603496	50555	98.9	1.1	4337	46	50555	1099.02	1065.93	4
Spirochaeta smaragkinae DSM 11293	573413	648028052	j. Illumina Std(PE)	101	123	73	1	49	50	1404	113	58668	1.26	1649	2066	8	14469	0.31	3250	3250	2	6500	0.13	0	2	1	2	4	1	3994	18	102	144	69	10	7.49	167	48.97	4654051	4603613	50438	98.92	1.08	4337	107	50438	471.38	603.76	1
Spirochaeta smaragkinae DSM 11293	573413	648028052	k. Illumina Std(PE)LMP	46	318	230	58	30	50	1404	113	58668		1649	2066	8	14469		3250	3250	2	6500		0	0	0	0	0	0	4039	17	57	50	85	58	5.8	13		4653970	4573579	80391	98.27	1.73	4306	47	80391	1710.45	1721.19	21
Spirochaeta smaragkinae DSM 11293	573413	648028052	o. Illumina Std(PE)LMP + PacBio	28	318	221	82	15	50	1404	113	58668		1649	2066	8	14469		3250	3250	2	6500		0	0	0	0	0	0	4047	16	56	49	52	37	2.56	13	48.96	4653970	4575233	78737	98.3	1.69	4306	30	360929	12031	23954.6	5
Starkeya novella DSMZ 506	639283	648028054	i. 454-Ti, 454-Ti-PE, Illumina Std(PE)	9	91	80	0	11	50	1192	88	19624	0.41	0	0	0	0	0	3090	3126	3	9323	0.19	0	1	0	0	1	0								17	67.9	4765023	4752924	12099	99.7	0.3	4480	10	12099	1209.9	1140.24	1
Sulfurimonas autotrophica OK10, DSM 16294	563040	648028058	d. Sanger, 454-Ti, 454-Ti-PE	10	43	29	4	10	50	1287	35	6762	0.31	1576	2052	4	7189	0.33	3344	5853	4	18517	0.85	1	0	0	0	0	0	2027	19	104		10	1	5.3	40	35.2	2153198	2127918	25280	98.8	1.2	2161	32	25280	790	1613.32	4
Thermoanaerobacterium thermosaccharolyticum DSM 571	580327	648028060	h. 454-Ti, 454-Ti-PE	70	178	95	16	67	50	1428	139	46696	1.67	1519	2600	35	67742	2.43	3088	3508	4	13398	0.48	2	0	2	1	0	0								109	34.1	2785752	2691907	93845	96.6	3.4	2752	85	93845	1104.06	1248.08	1
Vulcanisaeta distributa DSM 14429	572478	648028062	h. 454-Ti, 454-Ti-PE	8	77	72	0	5	50	516	77	10455	0.44	0	0	0	0	0	0	0	0	0	0	1	0	0	0	3	0								17	45.4	2374137	2365858	8279	99.7	0.3	2568	11	8279	752.64	1759.51	2
Halogeometricum borinquense PR3, DSM 11551	469382	649633053	a. Sanger	36	121	113	2	6	50	1472	119	39924	1.01	0	0	0	0	0	5618	5618	2	11236	0.28	1	1	0	4	3	1	3748	67	107		17	10	3.4	57	59.9	3944404	3915042	29362	99.3	0.7	3949	44	29362	667.32	897.58	1
Ilyobacter polytropus CuHBu1, DSM 2926	572544	649633056	h. 454-Ti, 454-Ti-PE	50	439	379	2	58	50	1282	406	95328	3.04	1514	2689	12	24077	0.76	3487	5511	21	103241	3.29	0	0	1	1	1	0	2692	54	184		16	3	6.9	94	34.4	3132314	3045370	86944	97.2	2.8	2949	69	86944	1260.06	1968.36	1
Ilyobacter polytropus CuHBu1, DSM 2926	572544	649633056	j. Illumina Std(PE)	107	439	324	14	101	50	1282	406	95328	3.04	1514	2689	12	24077	0.76	3487	5511	21	103241	3.29	0	0	0	2	0	0	2864	13	22	32	16	2	2.44	101	34.37	3132314	3037020	95294	96.96	3.04	2949	112	95294	850.84	1438.02	6
Ilyobacter polytropus CuHBu1, DSM 2926	572544	649633056	k. Illumina Std(PE)LMP	100	439	317	13	109	50	1282	153	42079	1.34	1514	2689	7	14151	0.45	3487	5511	12	58670	1.87	0	0	2	0	1	0	2870	17	18	32	9	3	2.1	100	34.4	3132314	3048725	83589	97.3	2.7	2949	107	83589	781.2	1295.5	2
Methanothermus fervidus DSM 2088	523846	649633067	h. 454-Ti, 454-Ti-PE	20	86	67	1	18	53	939	84	24684	1.98	0	0	0	0	0	5097	5102	2	10199	0.82	0	1	0	1	0	1	1028	33	235		19	3	19.5	31	31.6	1243342	1223188	20154	98.4	1.6	1318	21	20154	959.71	1379.9	4
Zymomonas mobilis pomaceae lectotype ATCC 29192	579138	650716107	b. Sanger, 454-FLX	5	21	17	0	4	75	859	13	5716	0.28	1920	1920	2	3840	0.18	5498	12483	6	41563	2.05	0	0	0	0	1	0								6	44	2027252	2007359	19893	99	1	1734	5	19893	3978.6	784.98	3119
Palaeococcus ferophilus DSM 13482	588319	2501025505	k. Illumina Std(PE)LMP										0					0					0	0	0	0	1	0	0	2301	10	10	5	6	1	0.9	12	54.32	2217824	2205943	11881	99.5	0.5	2333	14	11881	848.6	1088.6	8
Dethiosulfovibrio peptidovorans SEBR 4207, DSM 11002	469381	2501533205	b. Sanger, 454-FLX	22	120	95	0	25	57	1439	98	48020	1.86	1541	2507	9	17720	0.68	3245	12835	13	77997	3.02	0	1	0	2	1	0	2342	39	69		5	4	3.2	29	54.4	2576359	2524594	51765	98	2	2459	25	51765	2070.6	2632.69	1
Methanosalsum zhillnae DSM 4017	679901	2502171162	i. 454-Ti, 454-Ti-PE, Illumina Std(PE)	14	52	39	0	13	53	1326	43	21940	1.02	1604	2069	6	11011	0.51	5345	5361	3	16053	0.75	0	0	0	0	1	0								36	39.2	2138445	2127094	11351	99.5	0.5	2025	14	11351	810.79	1079.56	65
Aminomonas paucivorans DSM 12260	584708	2502790015	h. 454-Ti, 454-Ti-PE	46	61	30	8	23	50	1495	49	31062	1.18	1514	2436	9	18095	0.68	3314	5123	3	13559	0.51	6	2	0	1	1	0								80	67.6	2630123	2584375	45748	98.3	1.7	2429	57	45748	802.6	1266.49	1
Thermocrinis ruber DSM 12173	932678	2512875013	k. Illumina Std(PE)LMP	3	154	154	0	0	50	1246	61	17821	1.18	1647	1648	2	3295	0.21	0	0	0	0	0	0	0	0	0	0	0	1572	4	22	8	9	8	2.89	4	45.17	1521037	1518866	2171	99.85	0.14	1623	3	2171	723.67	484.65	380
Thermocrinis ruber DSM 12173	932678	2512875013	o. Illumina Std(PE)LMP + PacBio	0	154	154	0	0	50	1246	61	17821	1.18	1647	1648	2	3295	0.21	0	0	0	0	0	0	0	0	0	0	0	1573	4	22	8	1	0	0	1	45.17	1521037	1521037	0	100	0	1623
[truncated: 45 more columns]
